# Supplementary material
Source: PubMed Central journal article supplement (PMC5747245)
Supplement: NIHMS929083-supplement-sup.pdf [file NIHMS929083-supplement-sup.pdf]

### Supplementary Table S1

A complete list of all subjects included in and excluded from this study. Based on the inclusion criteria, 18 children (marked in yellow) were first excluded

| Indication for MR Imaging     | Final Neurologic Diagnosis  | No. of Children (total 107) |
|-------------------------------|-----------------------------|-----------------------------|
| Dizziness                     | Normal                      | 14                          |
| Headache                      | Normal                      | 16                          |
|                               | Chiari malformation         | 1                           |
| One episode of seizure        | Idiopathic febrile seizures | 13                          |
|                               | No cause determined         | 3                           |
|                               | Developmental delay         | 5                           |
| Suspected precocious puberty  | Normal                      | 10                          |
|                               | Pineal cyst                 | 3                           |
|                               | Rathke's cyst               | 1                           |
| Short stature                 | Normal                      | 10                          |
|                               | Developmental delay         | 3                           |
| Failure to thrive             | Normal                      | 5                           |
|                               | Developmental delay         | 5                           |
| Obesity                       | Normal                      | 8                           |
| Poor feeding                  | Normal                      | 3                           |
| Large head size               | Normal                      | 2                           |
| Suspected meningoencephalitis | Normal                      | 3                           |
| Suspected brain tumor         | Normal                      | 2                           |
